# Supplementary material for: Mild thrombocytopenia indicating maternal organ damage in pre-eclampsia: a cross-sectional study
Source: Research Square preprint supplement (doi:10.21203/rs.3.rs-103716/v1), 2020-11-12
Supplement: Supplementary file 1 [file 4a7ca998283a87169717685e.docx]

**Additional file 4** Relative risk of severe thrombocytopenia for preterm delivery and NICU admission.

|  | RR | 95% CI | p value |
| --- | --- | --- | --- |
| **Preterm delivery <34 GW** |  |  |  |
| Age* | 1.06 | 0.90–1.26 | 0.479 |
| Severe thrombocytopenia | 1.24 | 1.01–1.53 | 0.041 |
| Severe hypertension | 1.21 | 0.85–1.72 | 0.290 |
| utero-placental dysfunction | 2.14 | 1.56–2.93 | <0.001 |
| maternal organ damage except thrombocytopenia | 1.62 | 1.11–2.35 | 0.012 |
| **NICU admission** |  |  |  |
| Age* | 1.09 | 0.97–1.22 | 0.136 |
| Severe thrombocytopenia | 1.16 | 1.02–1.32 | 0.021 |
| Severe hypertension | 1.20 | 0.96–1.49 | 0.111 |
| Utero-placental dysfunction | 2.26 | 1.86–2.76 | <0.001 |
| Maternal organ damage except thrombocytopenia | 1.51 | 1.18–1.94 | 0.001 |

Severe thrombocytopenia: platelet count < 100 × 109/L

RR, relative risk; CI, confidence interval; GW, gestational weeks; NICU, neonatal intensive care unit
